# Supplementary material for: Critical Sites on Ostreolysin Are Responsible for Interaction with Cytoskeletal Proteins
Source: MDPI journal article supplement (doi:10.3390/biomedicines10102442), 2022-09-30
Supplement: s1 [file s1]

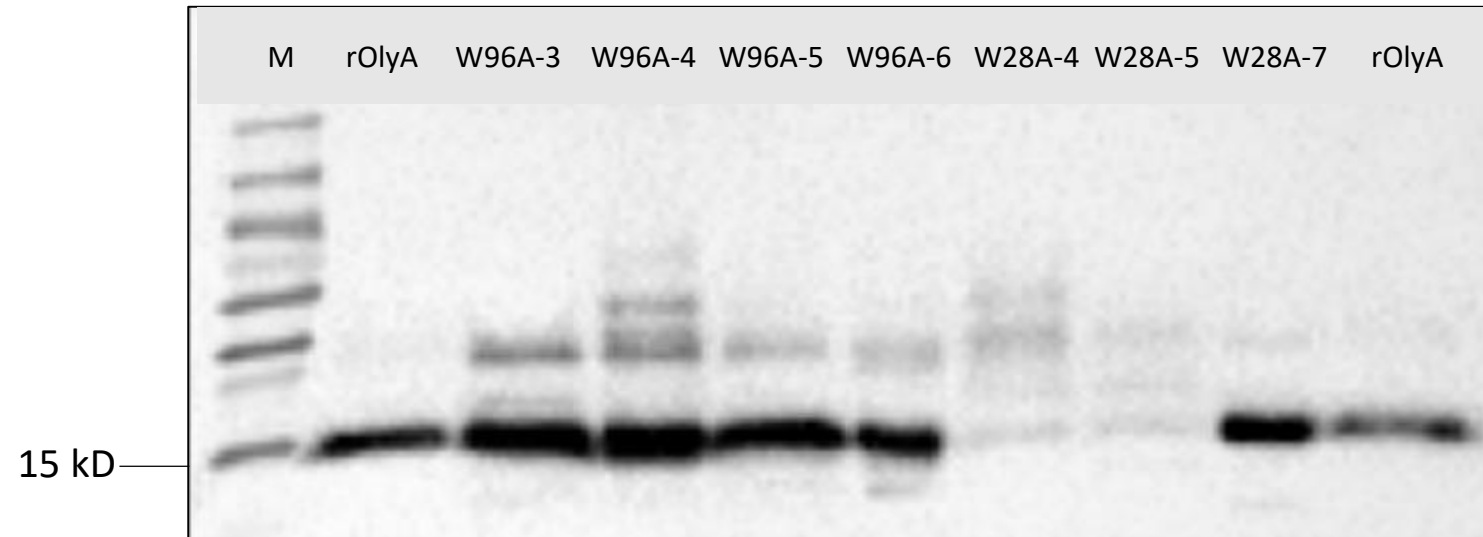

Supplementary Fig. S1

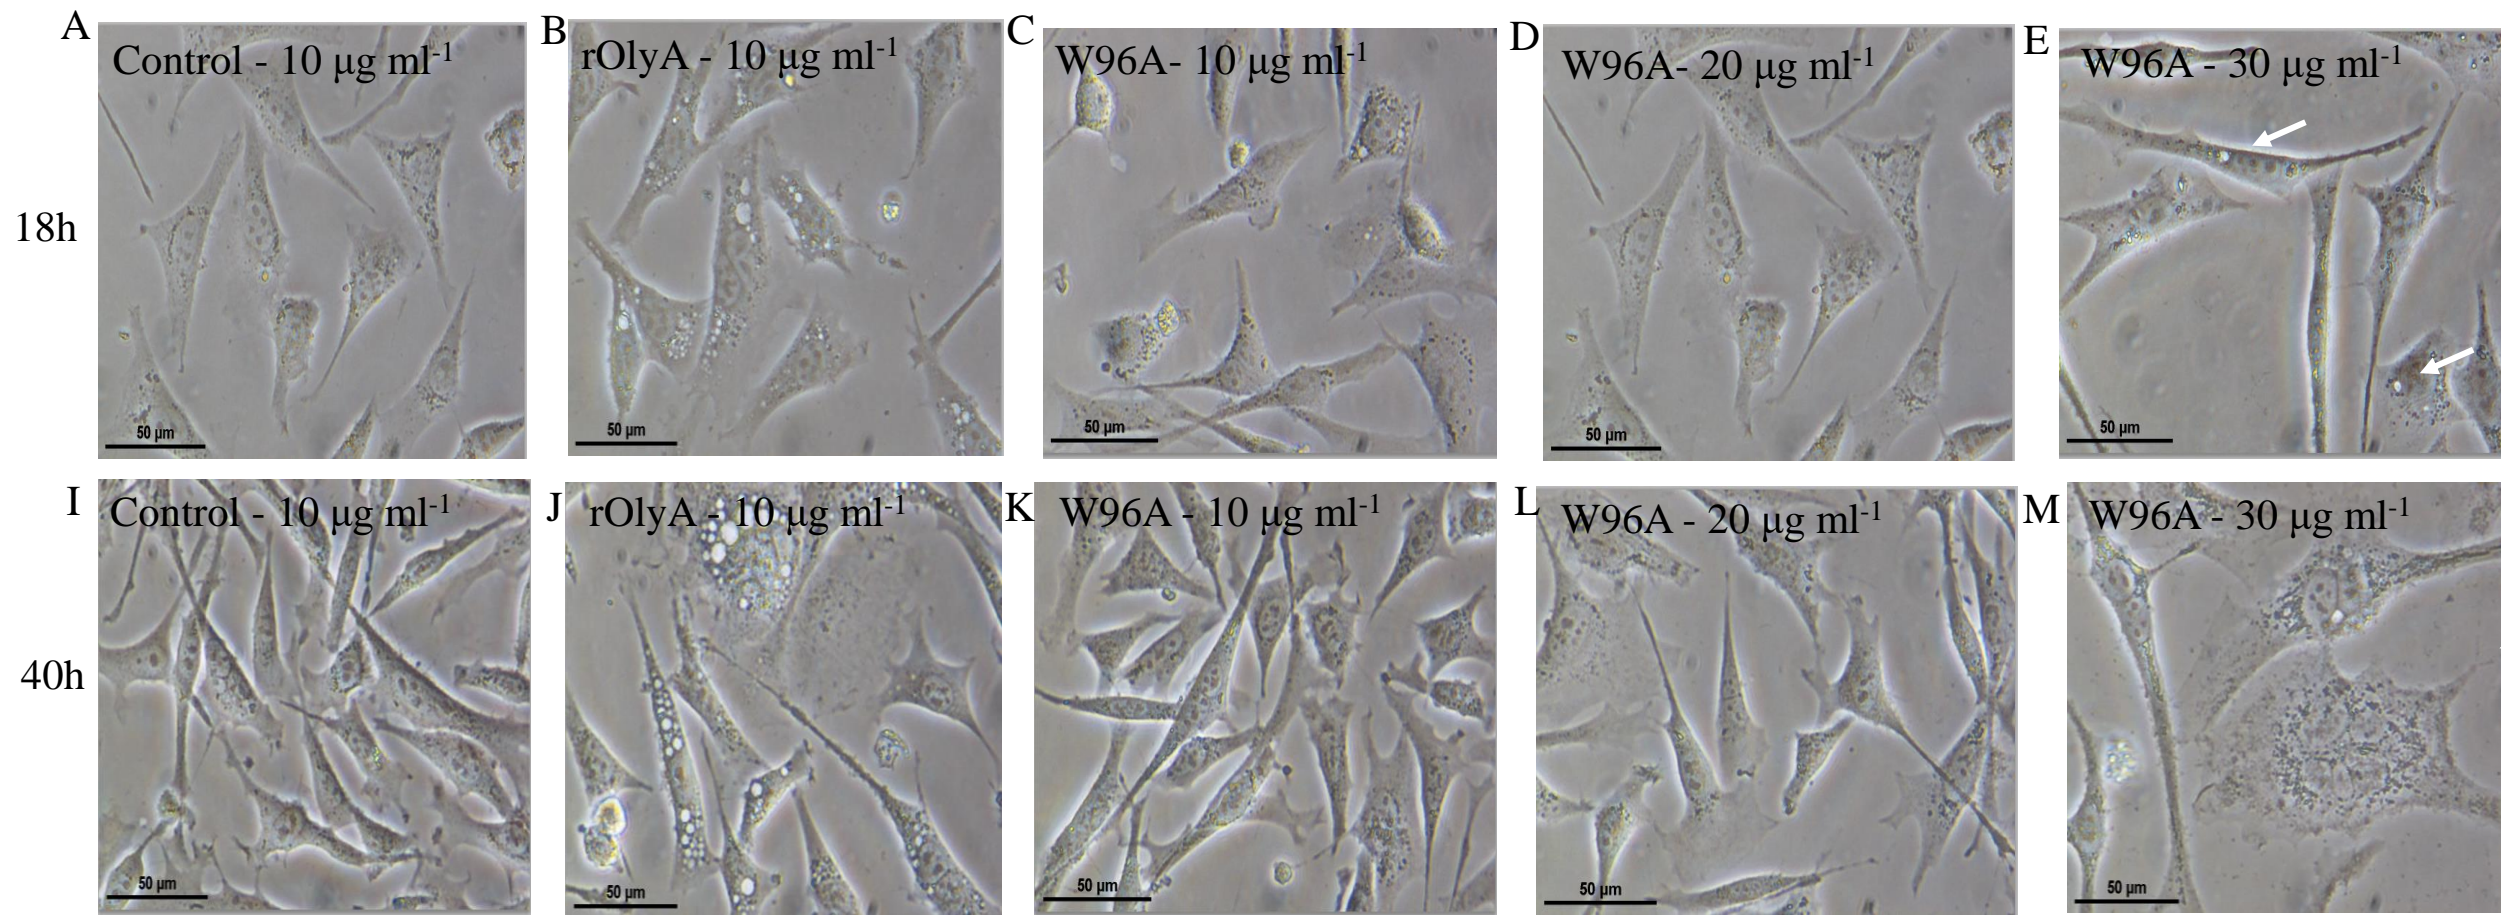

Supp. Fig. S2



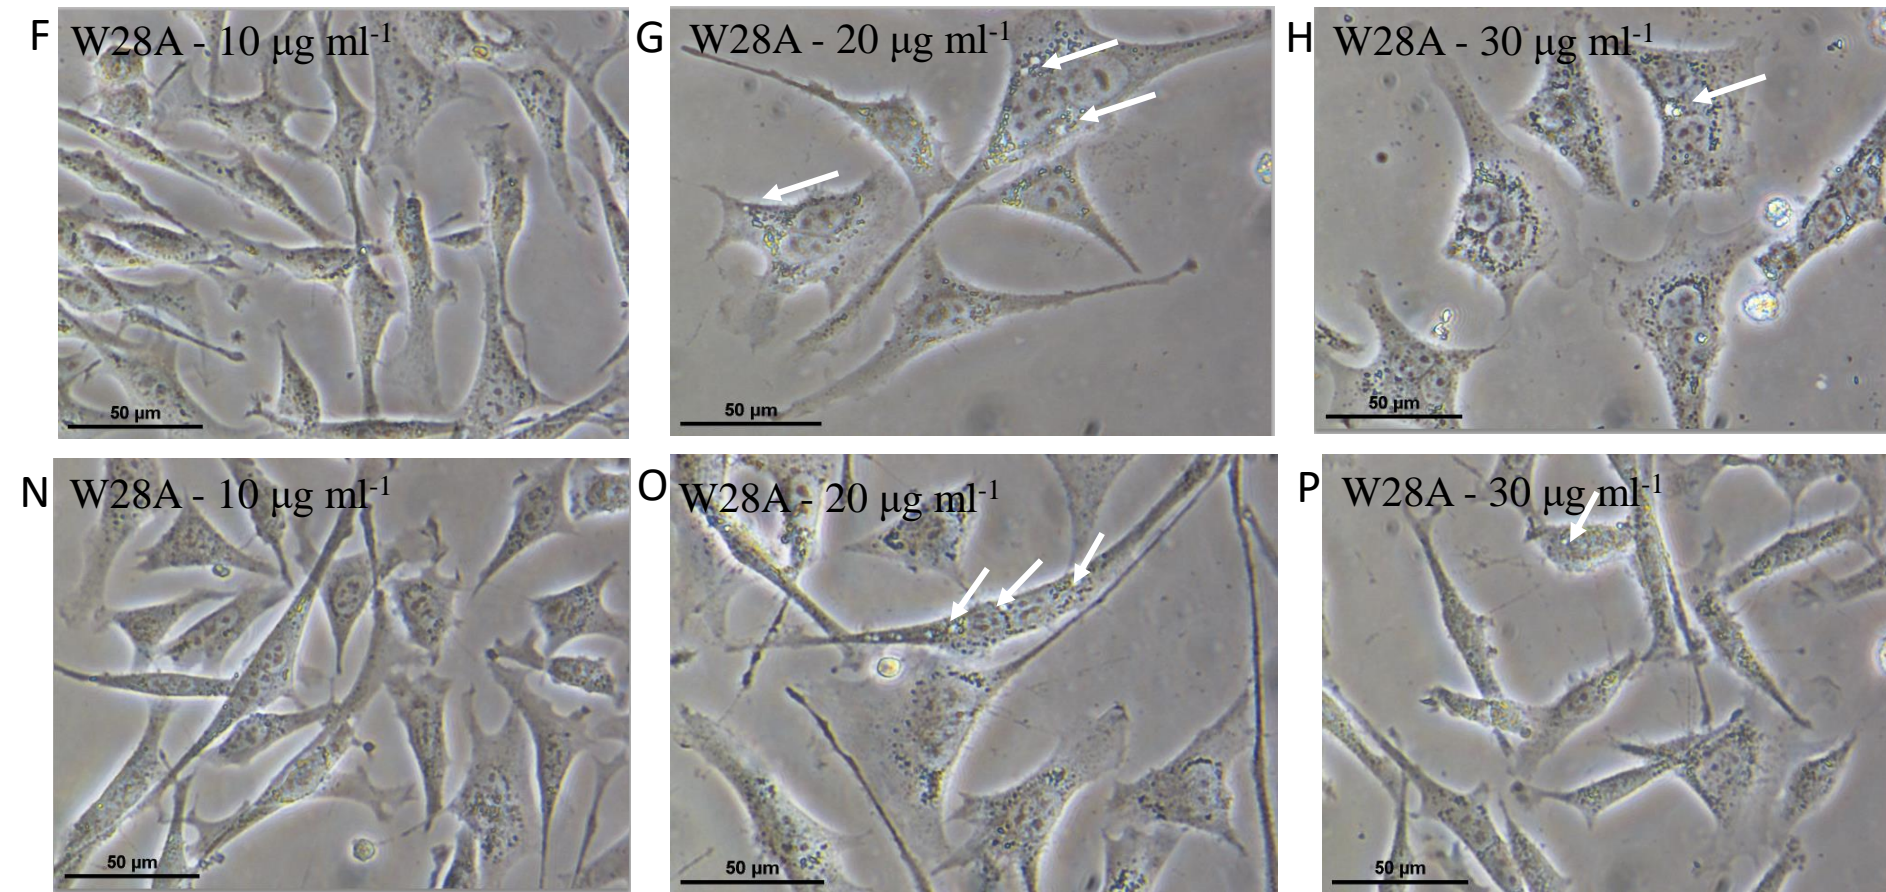

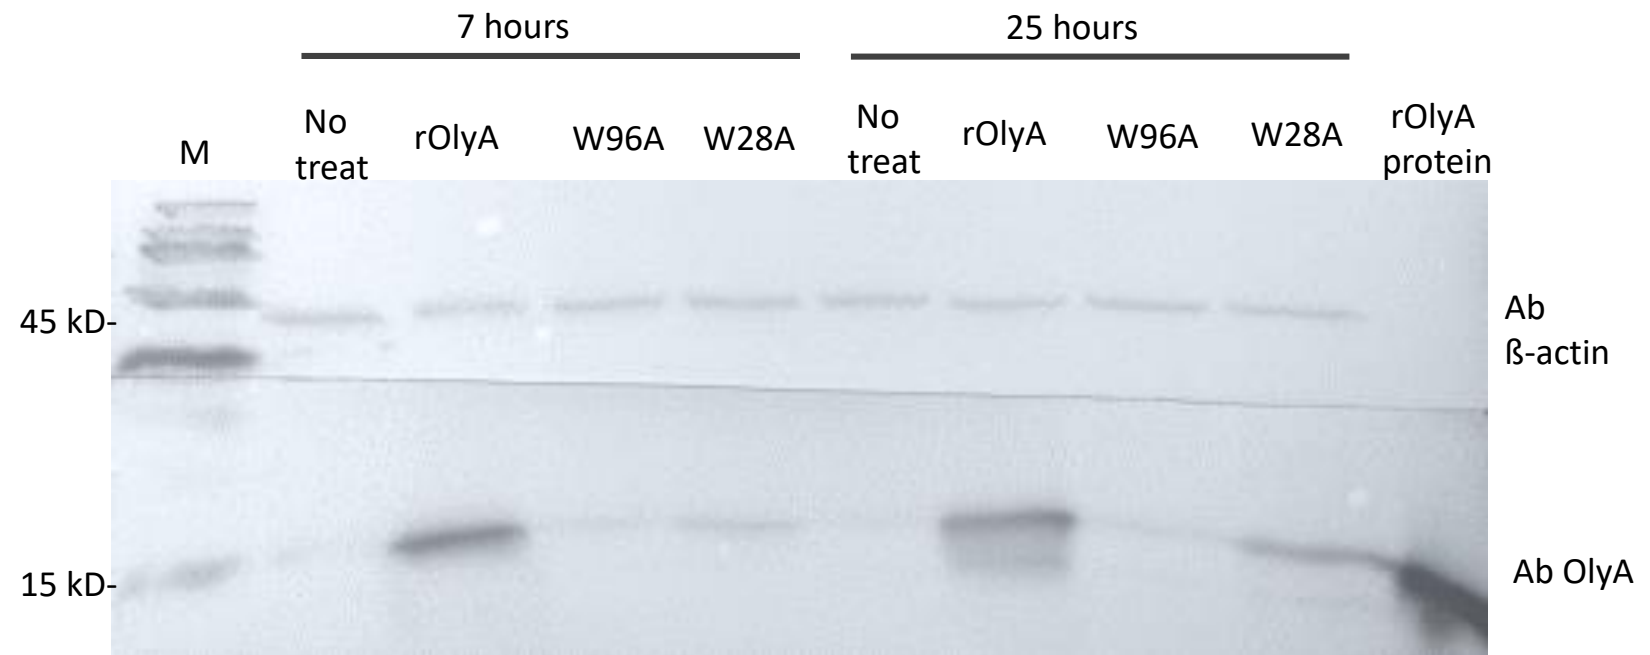

Supp. Fig. S3

A

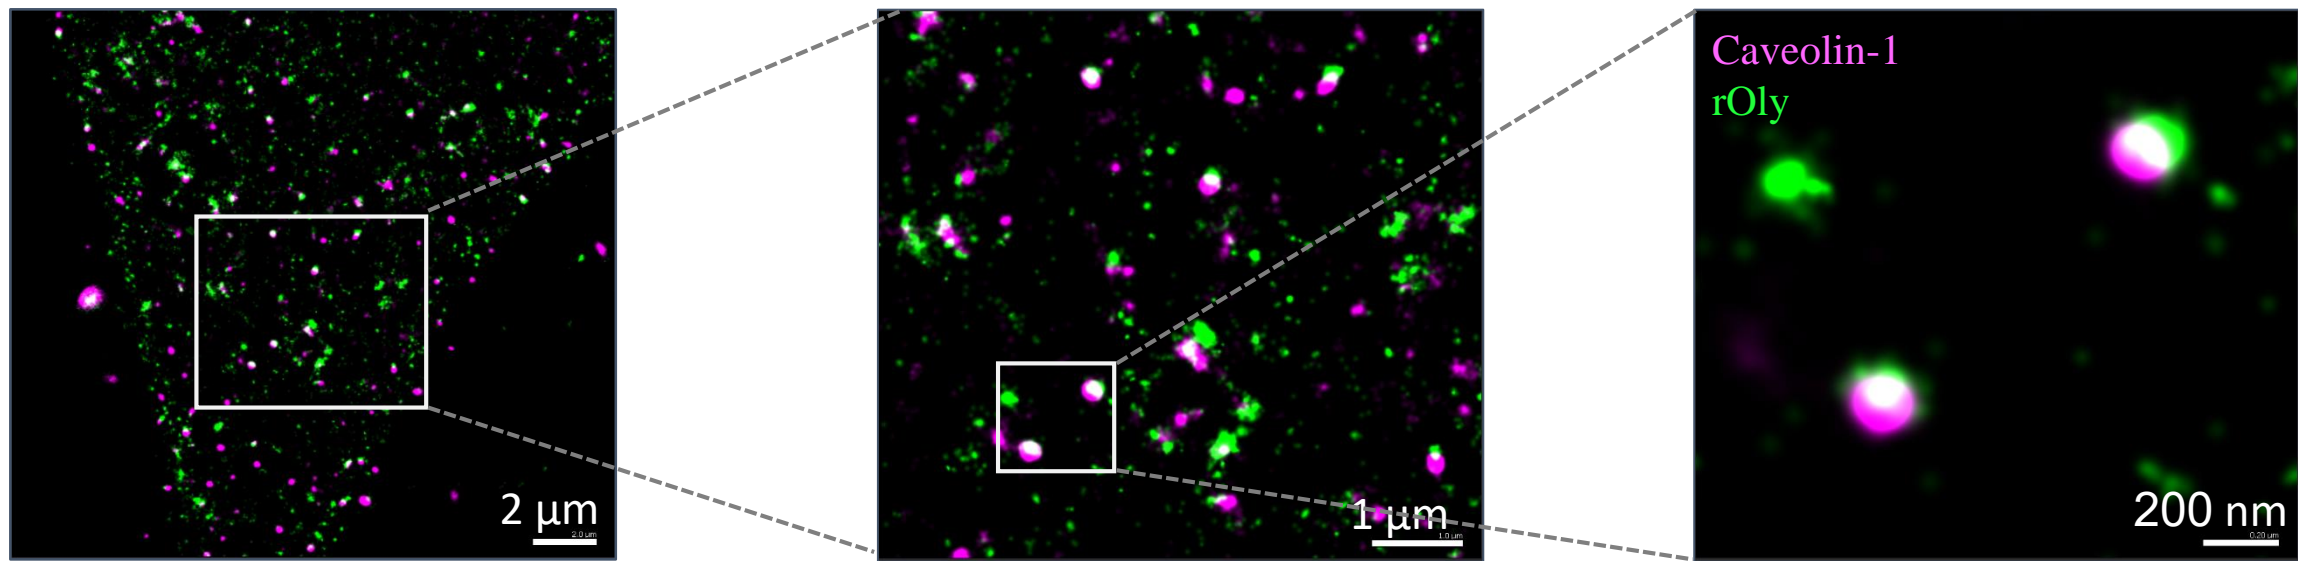

Supp. Fig. S4

**B**

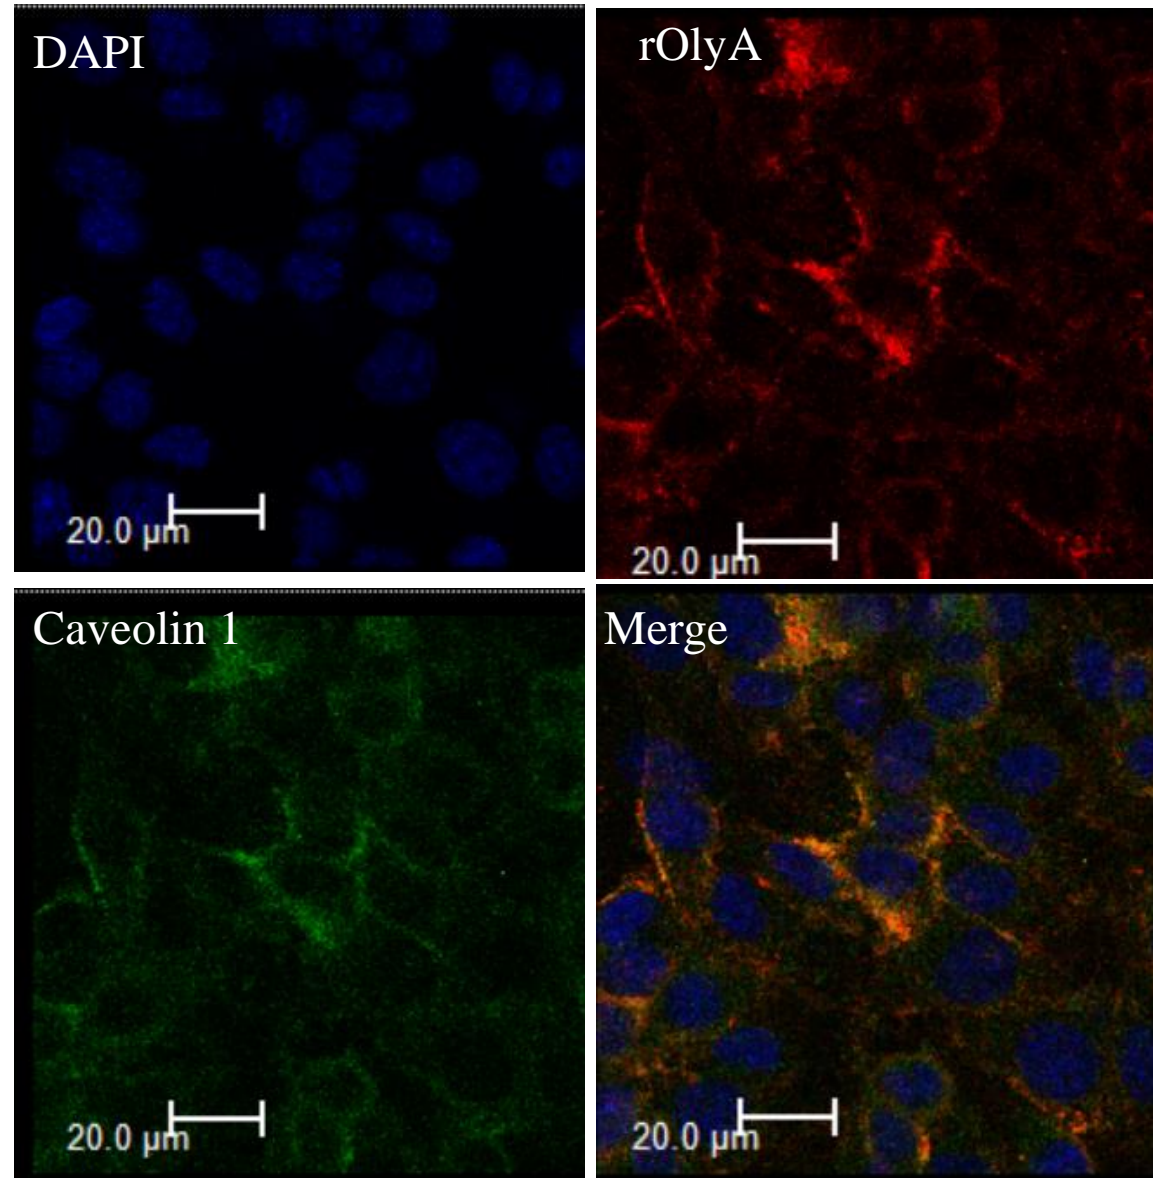

Supp. Fig. S4B



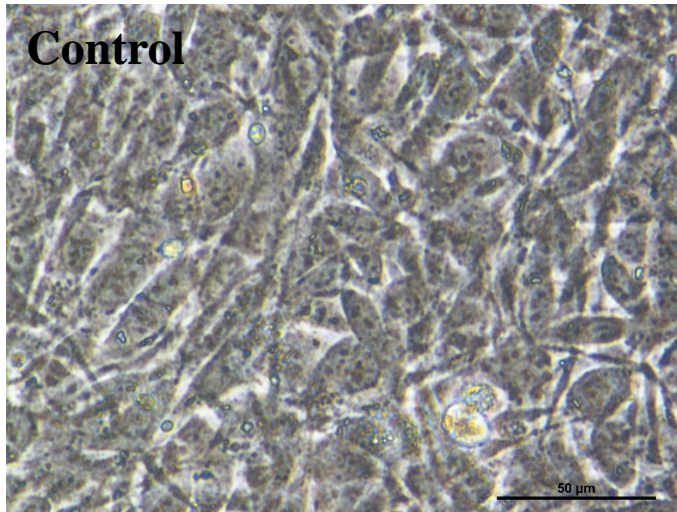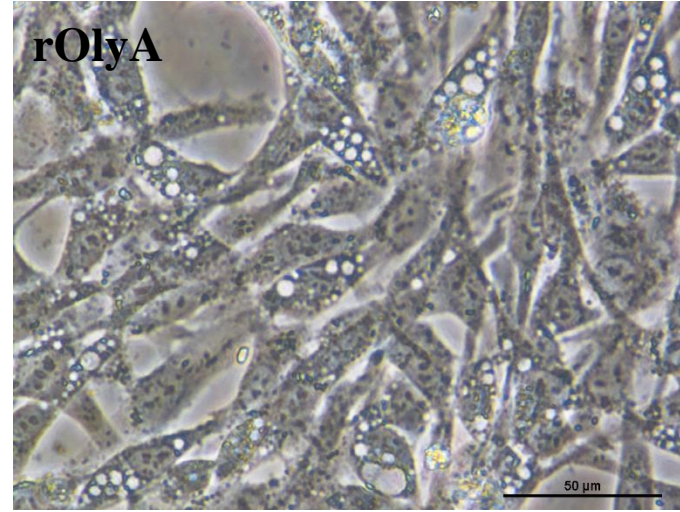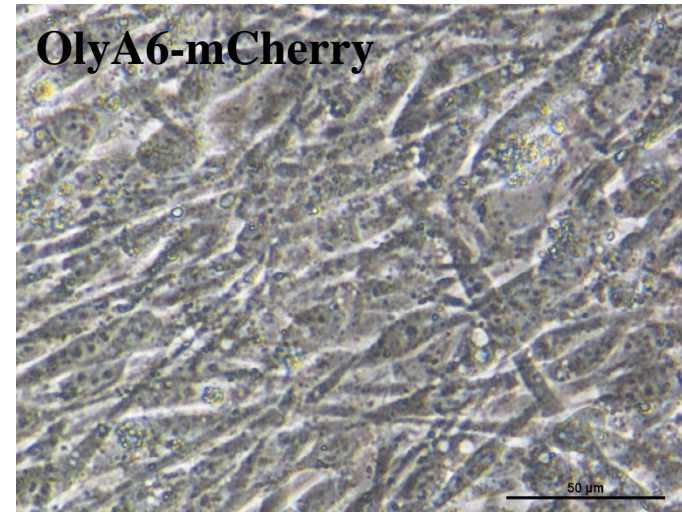

Supp. Fig. S5

Control Cells

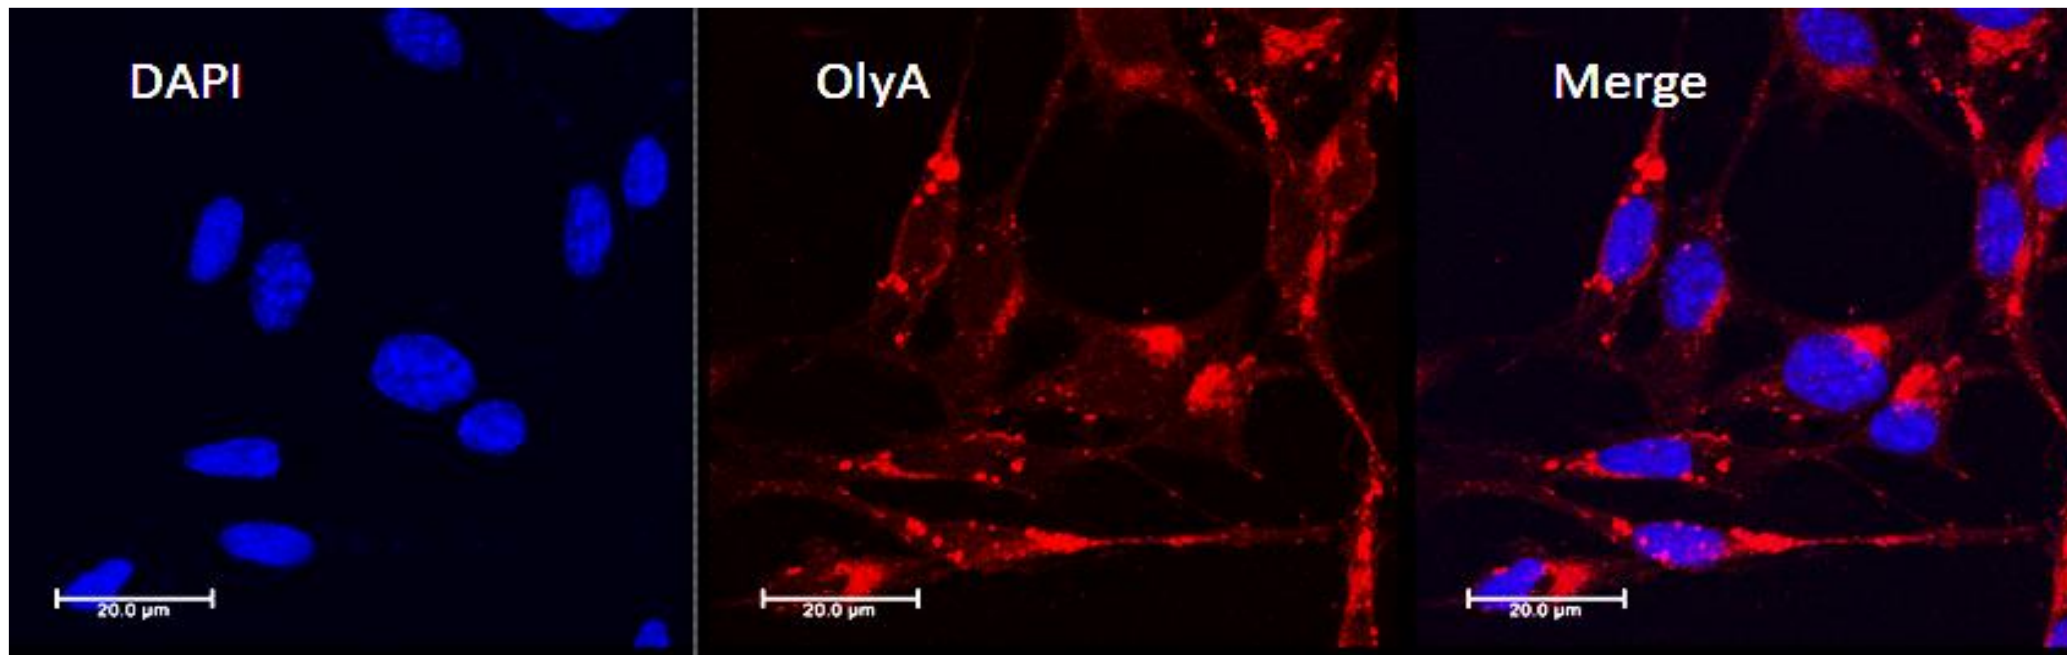

M $\beta$ CD-Treated Cells

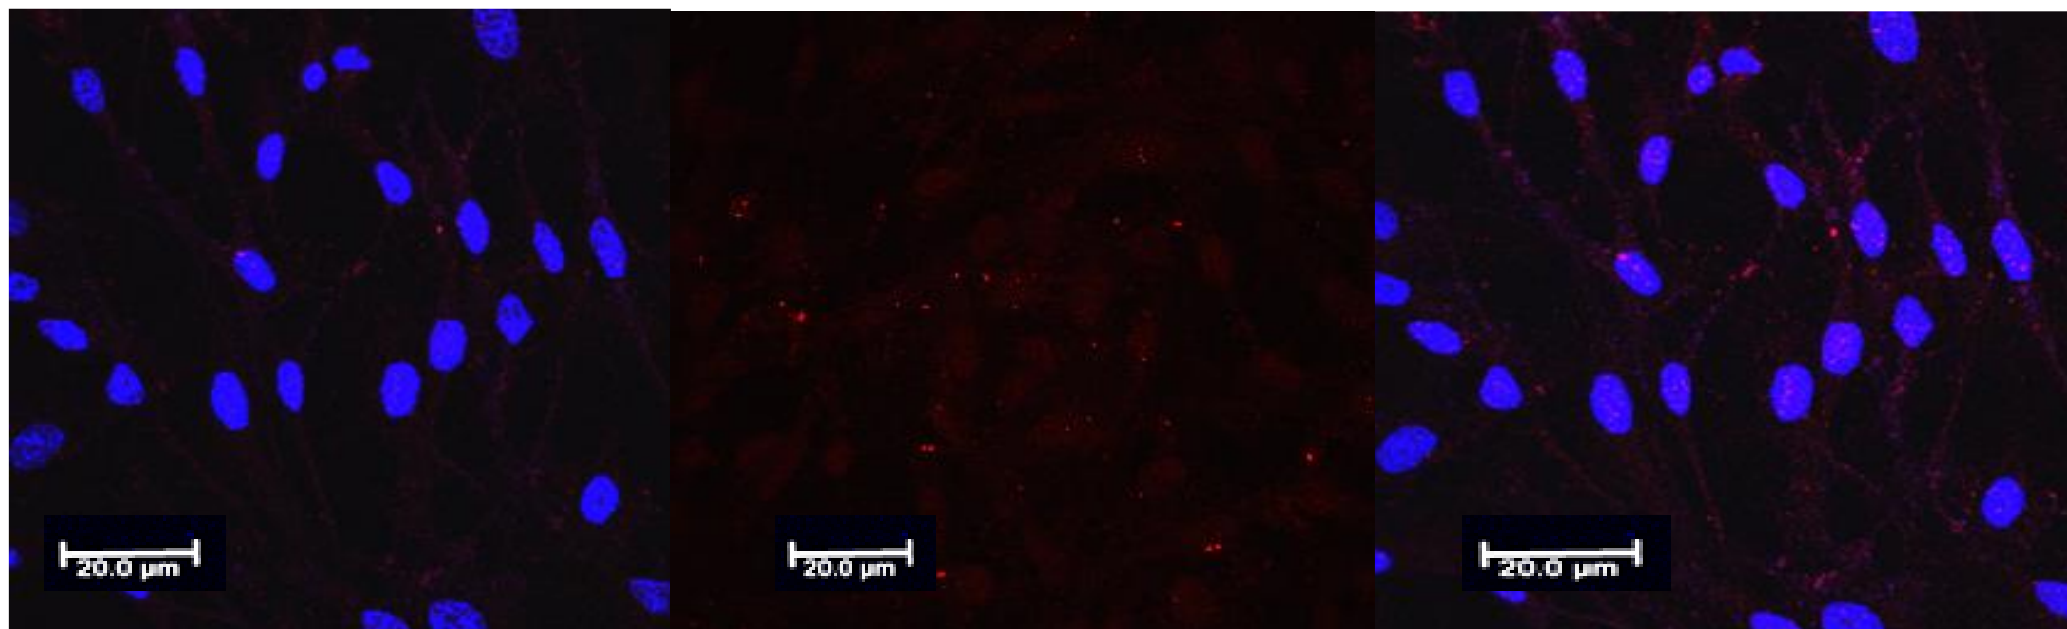



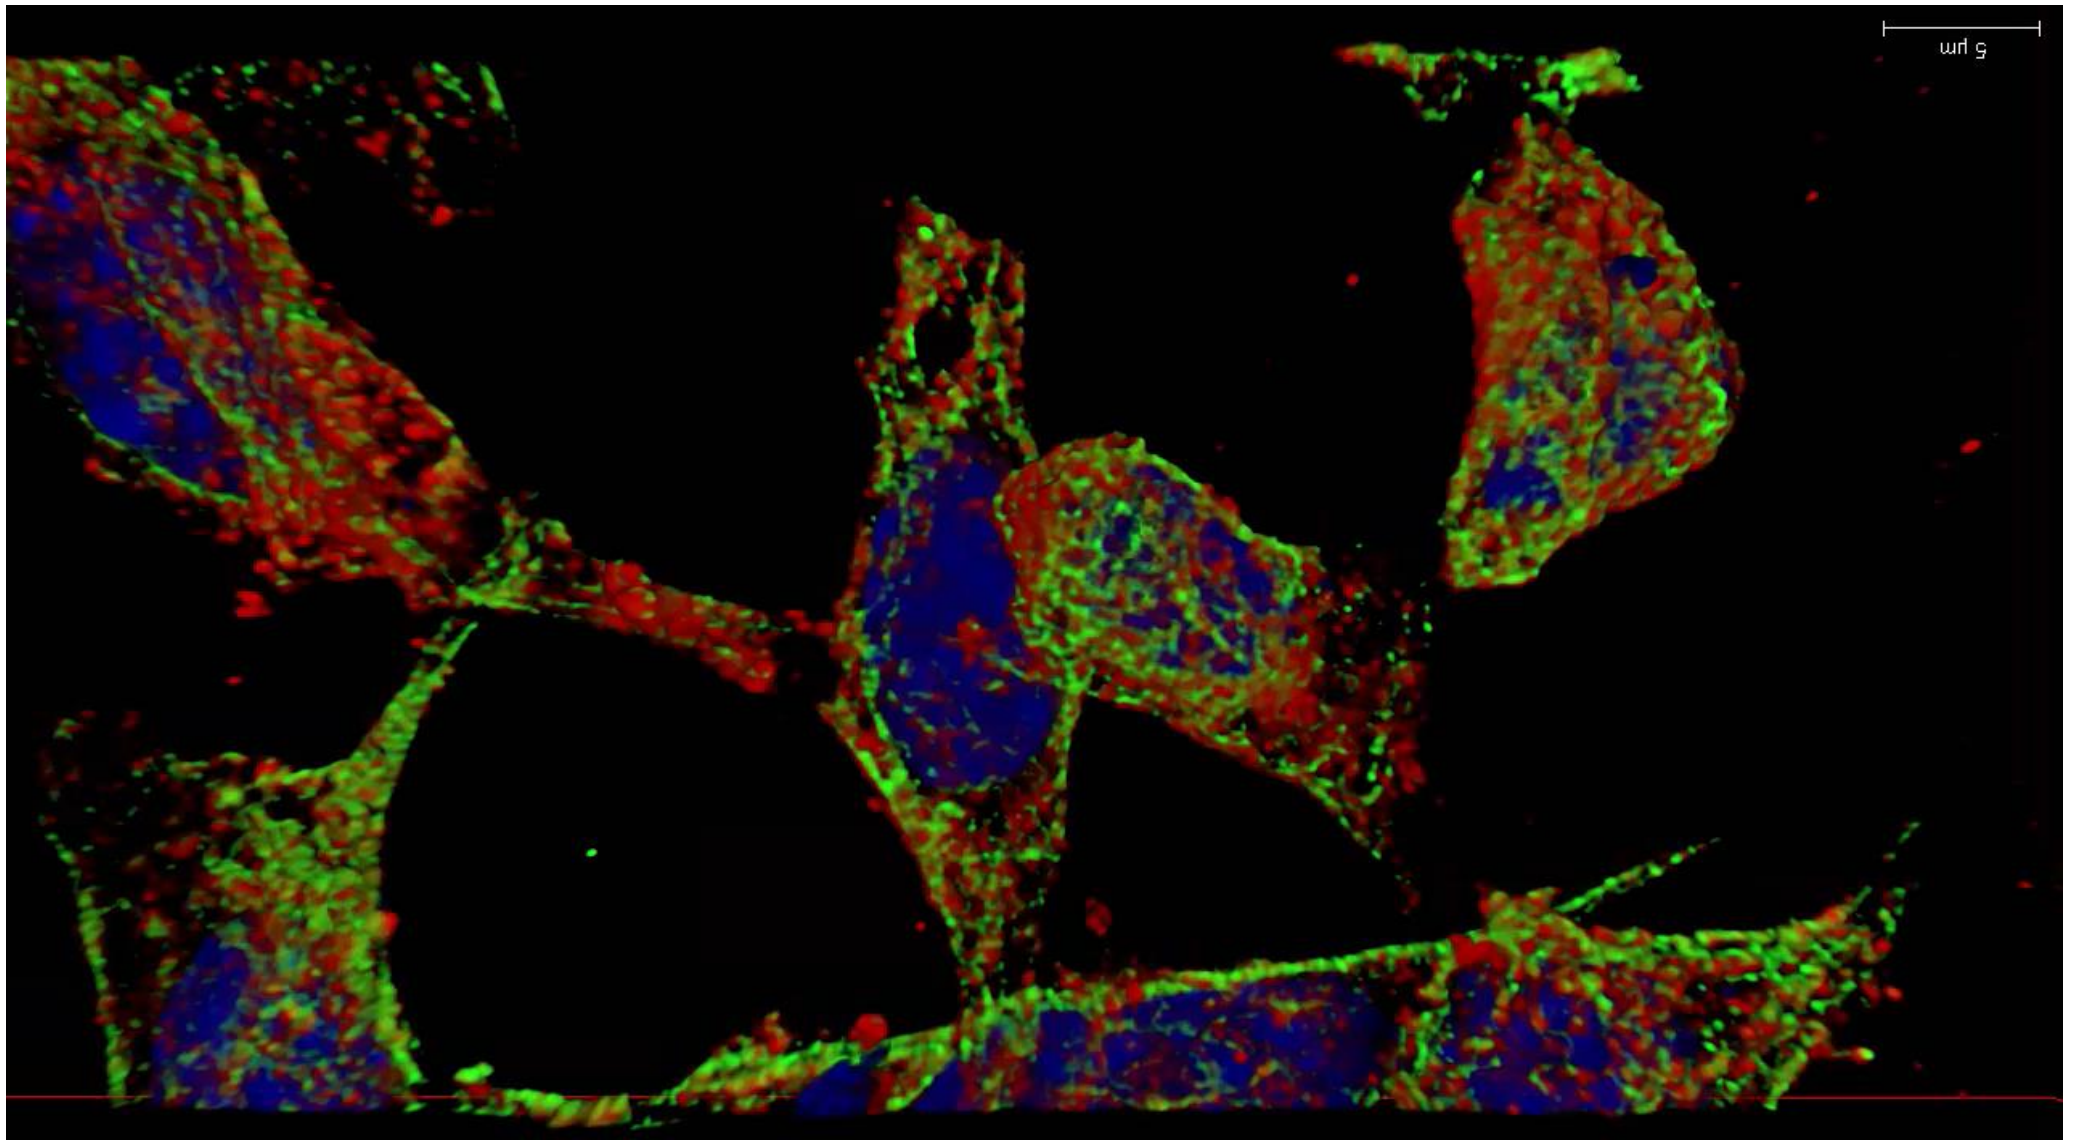

Supp Fig.  
S6 Video  
S1
